# Supplementary material
Source: PubMed Central journal article supplement (PMC6988639)

Supplemental Figure

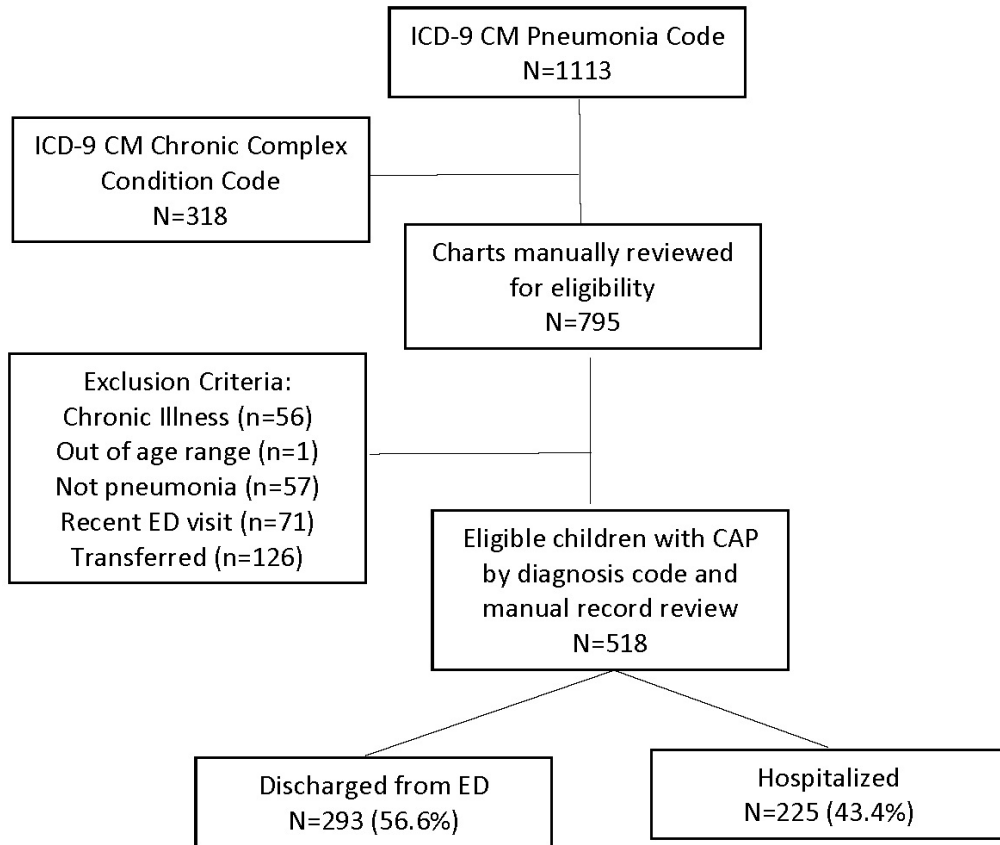

Supplement: NIHMS1066799-supplement-2.pdf [file NIHMS1066799-supplement-2.pdf]

Supplemental Figure- Percentage of Children with BTS Criteria met and Outcomes

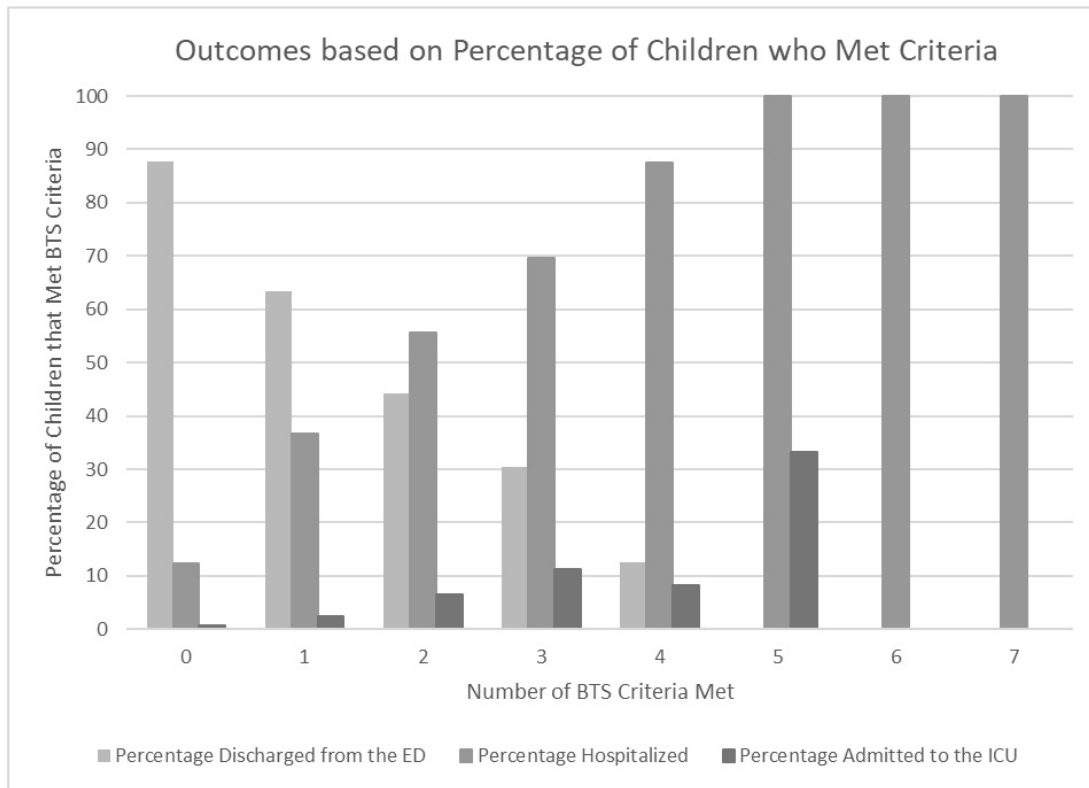

Supplement: NIHMS1066799-supplement-3.pdf [file NIHMS1066799-supplement-3.pdf]
